# Supplementary material for: Multiple ion isolation and accumulation events for selective chemical noise reduction and dynamic range enhancement in MALDI imaging mass spectrometry
Source: Royal Society of Chemistry journal article supplement (doi:10.1039/d4an00160e), 2024-01-01
Supplement: d4an00160e1.pdf [file d4an00160e1.pdf]

**Supporting Information:**

**Multiple ion isolation and accumulation events for selective chemical noise reduction and dynamic range enhancement in MALDI imaging mass spectrometry**

Troy R. Scoggins IV, Jonathan T. Specker, Boone M. Prentice\*

Department of Chemistry, University of Florida, Gainesville, FL 32611

\*Address correspondence to:

Dr. Boone M. Prentice

214 Leigh Hall

PO Box 117200

Department of Chemistry

University of Florida

Gainesville, FL 32611, USA

Phone: (352) 392-0556

Fax: (352) 392-4651

Email: [booneprentice@chem.ufl.edu](mailto:booneprentice@chem.ufl.edu)

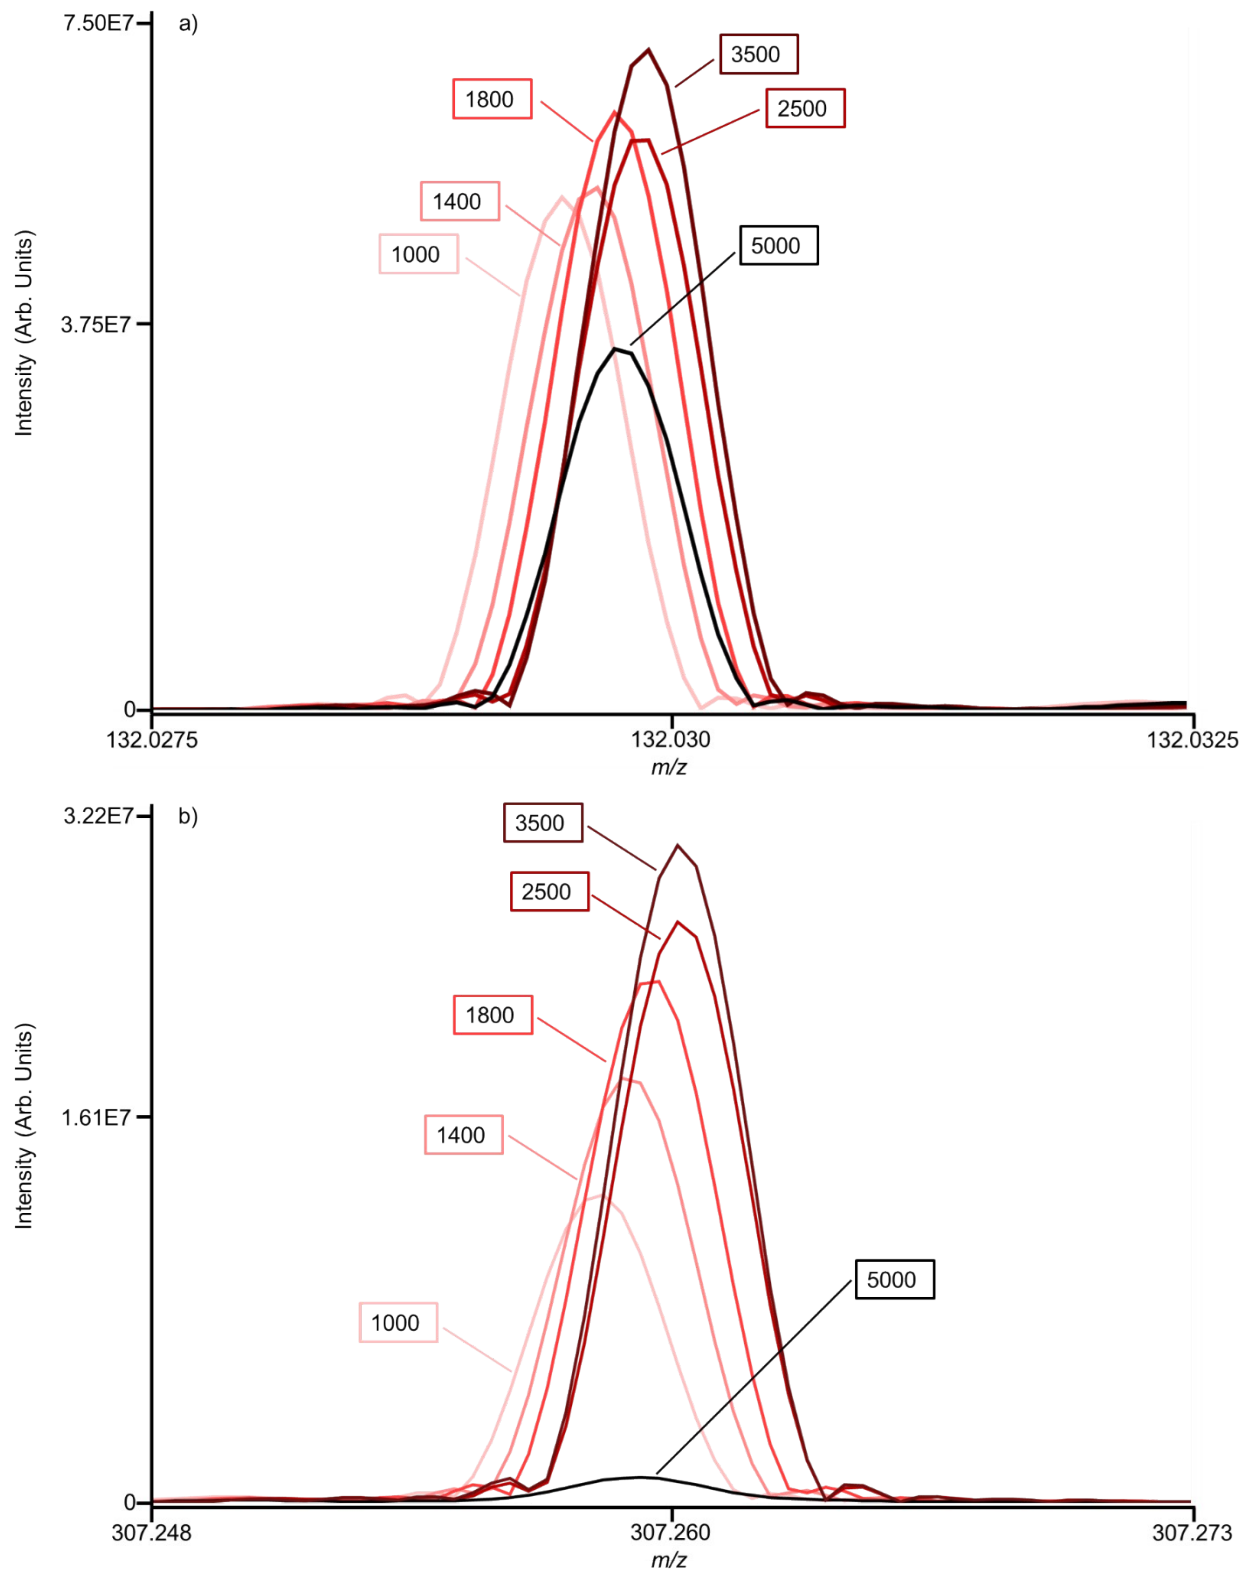

**Supplemental Figure 1.** Mass spectra (1,000-5,000 laser shots) of (a) aspartate and (b) eicosadienoate using a Multi CASI ( $m/z$  131  $\pm$  5 Da & 293  $\pm$  40 Da) method. All spectra are five scan average measurements.

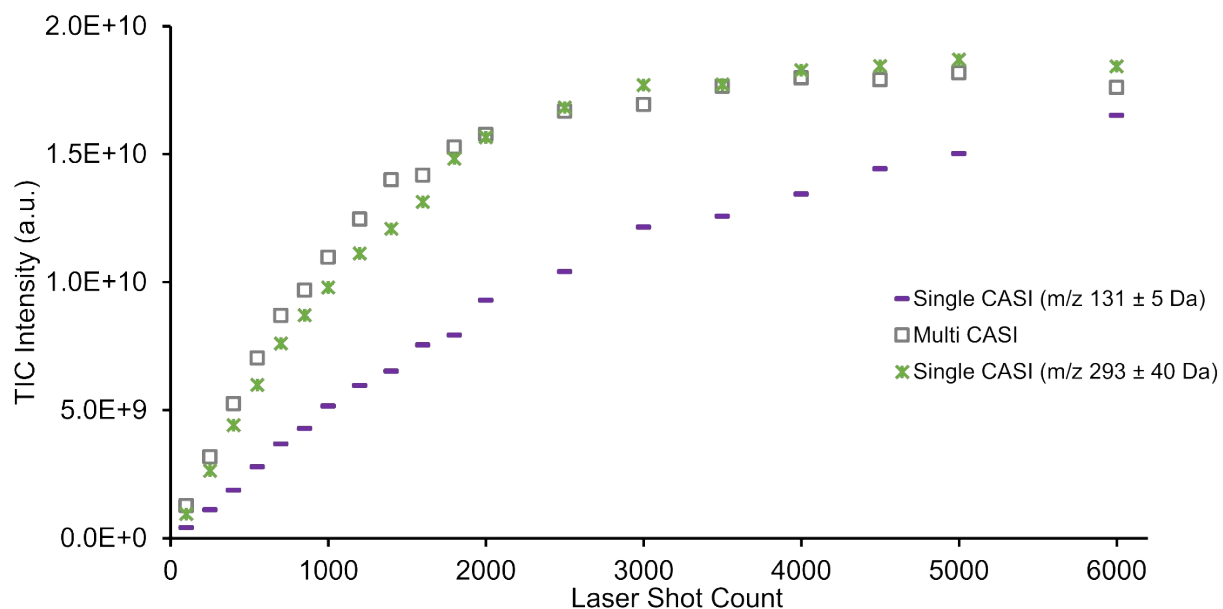

**Supplemental Figure 2.** Total ion count (TIC) as a function of the number of MALDI laser shots per window for a single CASI acquisition method ( $m/z 131 \pm 5$  Da represented by purple bars or  $m/z 293 \pm 40$  Da represented by a green x's) and a Multi CASI acquisition method ( $m/z 131 \pm 5$  Da and  $293 \pm 40$  Da represented by grey squares). Each measurement is acquired using five averaged scans.

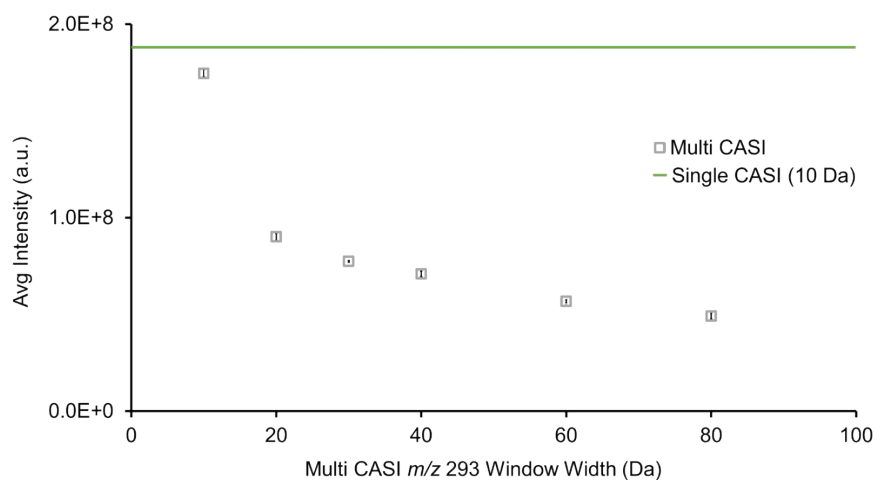

**Supplemental Figure 3.** Average intensity of aspartate ( $m/z$  132.030, 0.041 ppm) in a Multi CASI acquisition method ( $m/z$  131  $\pm$  5 Da and 293  $\pm$  5-40 Da, using 2,000 laser shots, represented by grey squares) as a function of the  $m/z$  293 isolation window width. Each measurement represents three, five scan average measurements. The green line represents the average intensity of aspartate in a single CASI acquisition method ( $m/z$  131  $\pm$  5 Da).
